# Supplementary material
Source: PubMed Central journal article supplement (PMC5724244)

# Supporting Information

Chen et al. 10.1073/pnas.1614452114

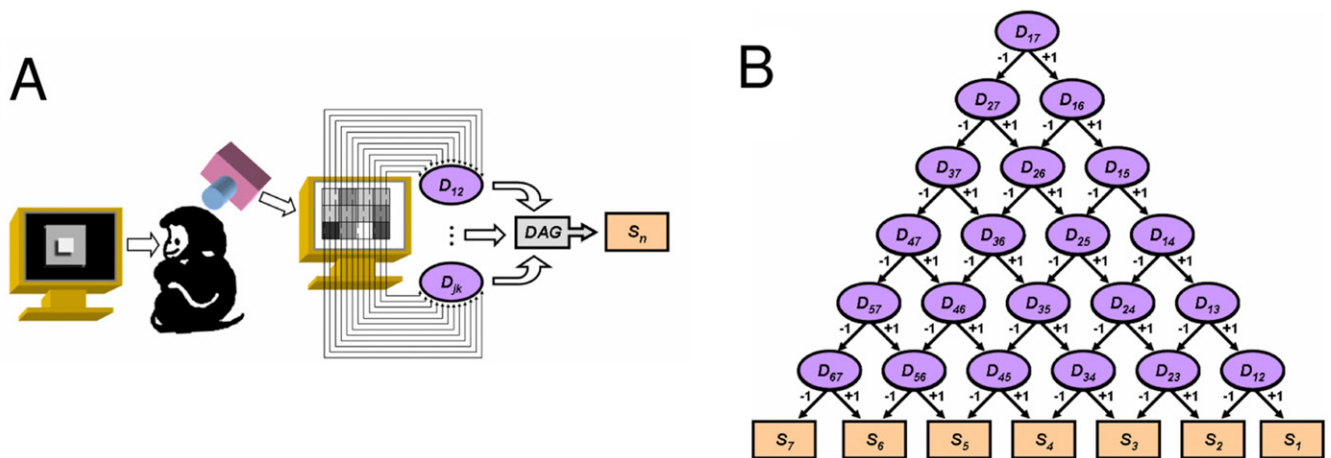

**Fig. S1.** Pattern classification analysis. (A) In pattern classification analysis, weights of linear detectors  $D_{12}, \dots, D_{jk}$  were optimized to predict the stimuli presented. Predictions were made by a DAG method. (B) DAG contains seven leaves to represent the seven disparities we tested ( $S_1, \dots, S_7$ ) and 21 internal nodes (linear detectors  $D_{12}, \dots, D_{67}$ ). A series of nodes are activated starting at root node  $D_{17}$ . The output of the linear detector (+1 or -1) determines which edge to exit. The value of the predicted disparity is the value associated with the final leaf node.

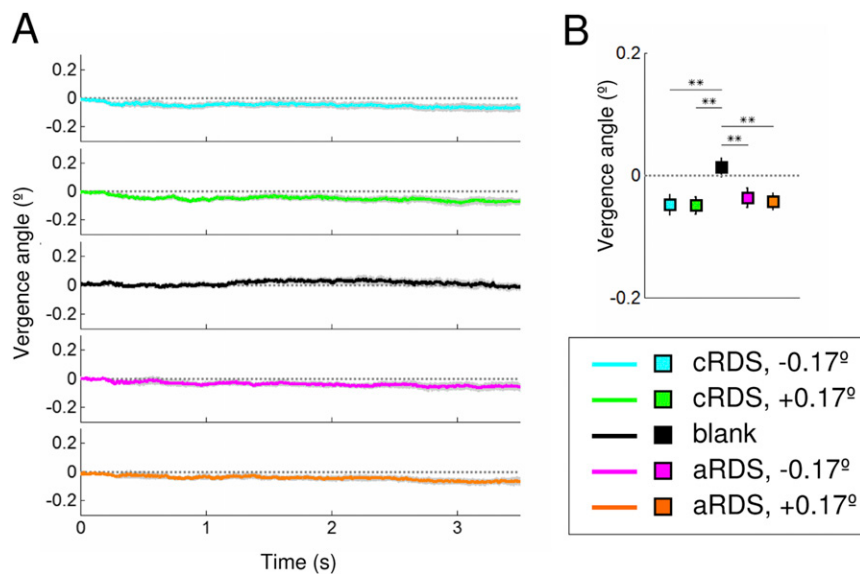

**Fig. S2.** Vergence status during viewing of RDS stimuli. (A) Stability of eye vergence over the 3.5-s trial period of each stimulus condition. Simple fixation without RDS presentation, black. Colors, see legend. Gray shaded areas, SEM. (B) The average vergence over the 3.5 s of stimulation. Error bars,  $\pm$ SEM.  $**P < 0.05$ .

**A**

cRDS (100%)

cRDS (12.5%)

**B**

$d'$

Accuracy (%)

cRDS (100%)

cRDS (12.5%)

**C**

cRDS (100%)

Accuracy (%)

Time (s)

**D**

cRDS (12.5%)

Accuracy (%)

Time (s)

2 of 3

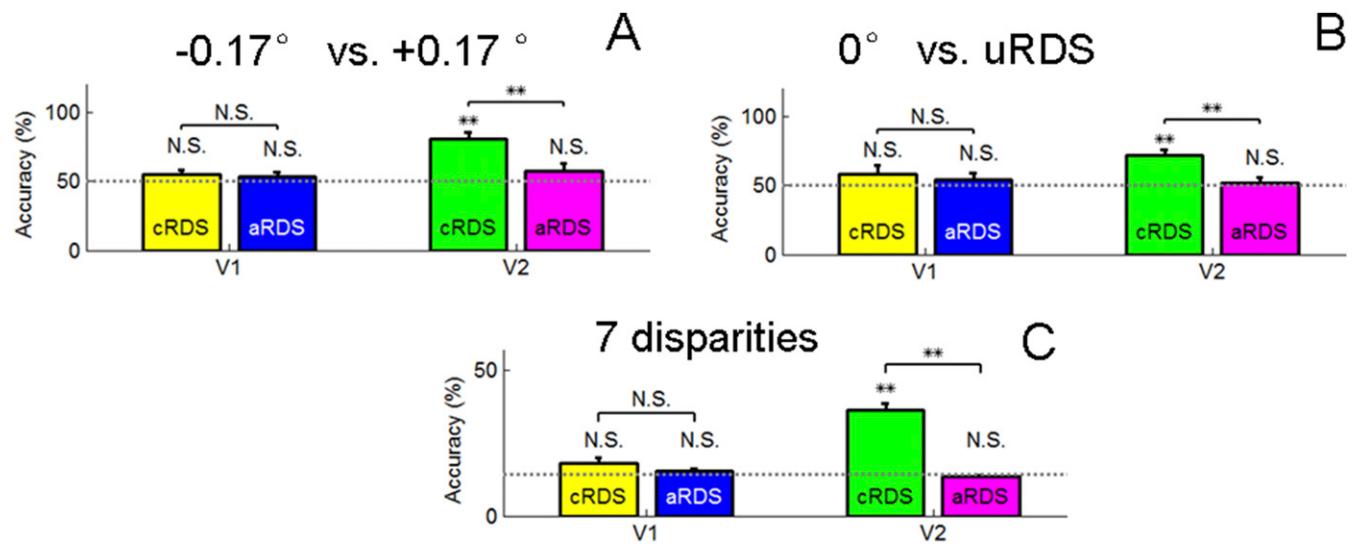

Supplement: pnas.201614452SI.pdf [file pnas.201614452SI.pdf]
